# Supplementary material
Source: publisher site journal article supplement (https://www.spandidos-publications.com/667/downloadSupplementary)
Supplement: Supplementary file 1 [file downloadSupplementary]

Figure S1. Effect of LQB-118 on cell line attachment on the surface of culture flasks. U251-MG, A172 and T98G cells were photographed after treatment with LQB-118 6  $\mu$ M and 12  $\mu$ M. Contrast phase photomicrography representative of three independent experiments magnified 10 times. Scale bar, 100  $\mu$ m. GBM, glioblastoma.

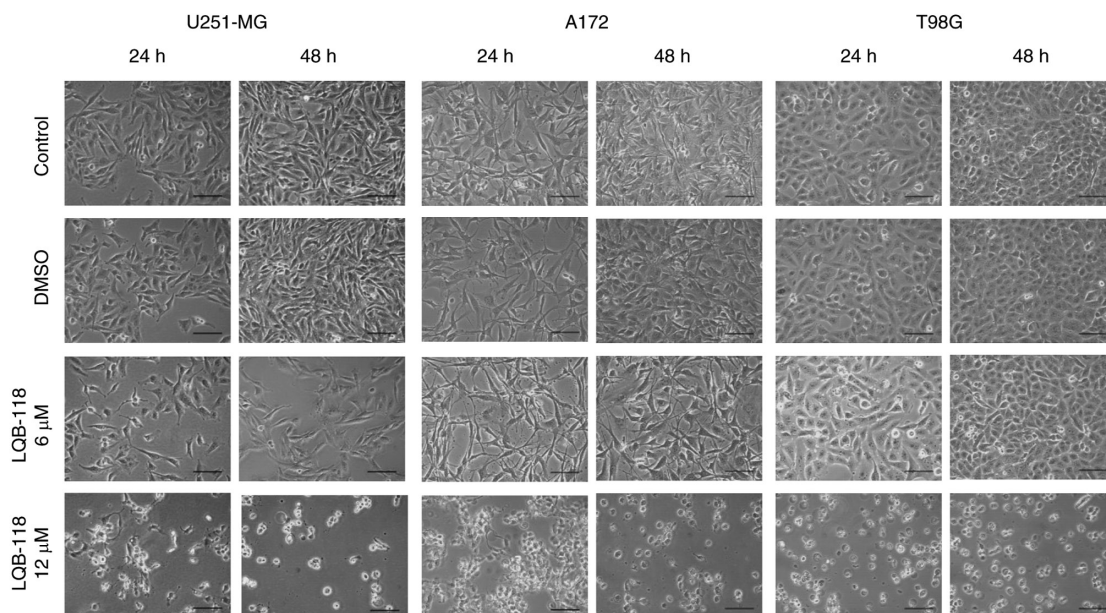

Table SI. Combination index in A172 and U251-MG cells after LQB-118 combined treatment.

| A172 (48 h)      |              |               | U251 (48 h)      |              |               |
|------------------|--------------|---------------|------------------|--------------|---------------|
| CI grade symbols |              |               | CI grade symbols |              |               |
| Cisplatin        |              |               | Cisplatin        |              |               |
| LQB-118          | 3.0 $\mu$ M  | 30.0 $\mu$ M  | LQB-118          | 3.0 $\mu$ M  | 30.0 $\mu$ M  |
| 3.0 $\mu$ M      | 1.01 $\pm$   | 0.95 $\pm$    | 3.0 $\mu$ M      | 0.55 ++      | 0.42 ++       |
| 6.0 $\mu$ M      | 0.97 $\pm$   | 1.77 - -      | 6.0 $\mu$ M      | 0.65 ++      | 0.53 ++       |
| Temozolomide     |              |               | Temozolomide     |              |               |
| LQB-118          | 50.0 $\mu$ M | 100.0 $\mu$ M | LQB-118          | 50.0 $\mu$ M | 100.0 $\mu$ M |
| 3.0 $\mu$ M      | 1.43 -       | 1.25 -        | 3.0 $\mu$ M      | 0.62 ++      | 0.66 ++       |
| 6.0 $\mu$ M      | 1.33 -       | 1.92 - -      | 6.0 $\mu$ M      | 0.86 +       | 0.85          |

+ Synergism and antagonism were established based on CI determined by the Chou and Talalay method. The following grade symbols were adapted from Chou, 2016: Additive/nearly additive effect ( $\pm$ ), CI: 0.9-1.1; moderate antagonism (-), CI: 1.1-1.5; antagonism (- -), CI: 1.5-3.3; Strong antagonism (- - -), CI >3.3; moderate synergism (+), CI: 0.7-0.9; synergism (++), CI: 0.3-0.7; Strong synergism (+++), CI <0.3. CI, combination index.
